# Supplementary material for: New insight into structural transformation in Li-rich layered oxide during the initial charging
Source: Royal Society of Chemistry journal article supplement (doi:10.1039/c5ta01849h), 2015-01-01
Supplement: c5ta01849h1.pdf [file c5ta01849h1.pdf]

## **New Insight into Structural Transformation in Li-Rich Layered Oxide during the Initial Charging**

**Chong-Heng Shen,<sup>a</sup> Shou-Yu Shen,<sup>a</sup> Fang Fu,<sup>a</sup> Chen-Guang Shi,<sup>a</sup> Hui-Yi Zhang,<sup>a</sup> Mwizerwa Jean Pierre,<sup>a</sup> Hang Su,<sup>b</sup> Qi Wang,<sup>a</sup> Bin-Bin Xu,<sup>a</sup> Ling Huang\*,<sup>a</sup> Jun-Tao Li,<sup>b</sup> and Shi-Gang Sun<sup>a,b</sup>**

5

10

15

20

25

30

35

40

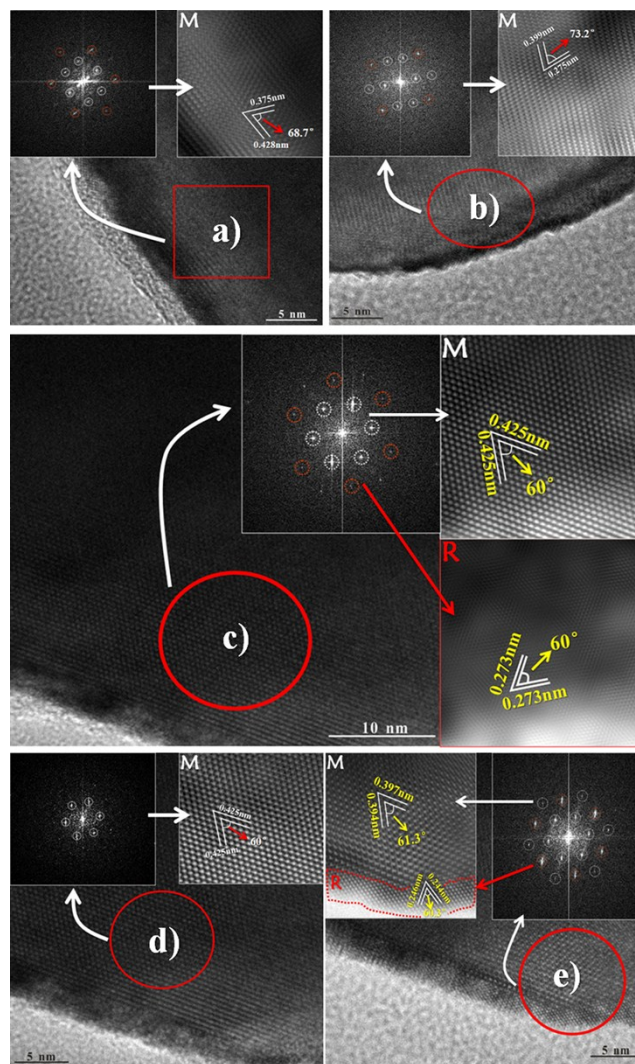

**Figure S1.** Five areas (a, b, c, d and e) in different particles from HR-TEM images including FFT and IFFT graphs of the pristine as-prepared material.

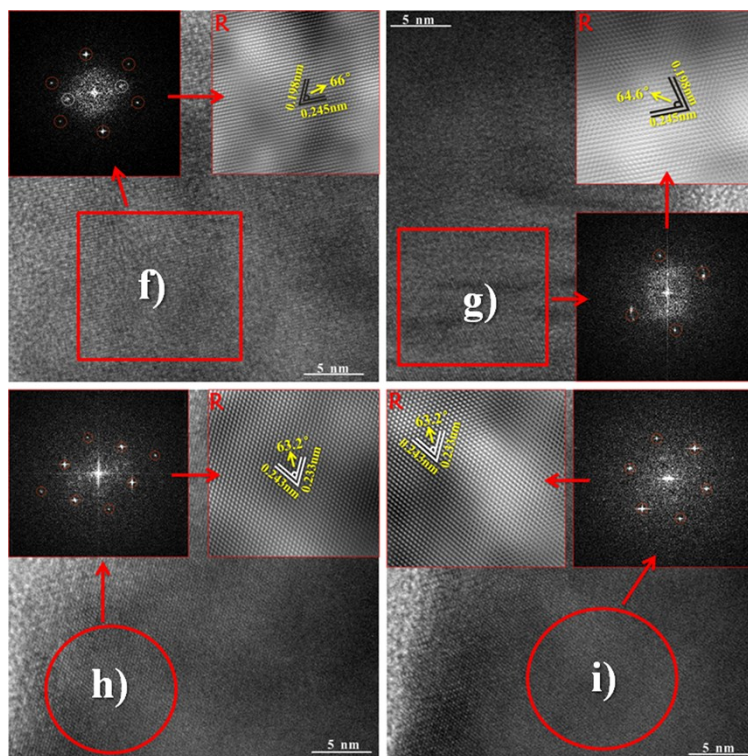

**Figure S2.** Four areas (f, g, h and i) in different particles from HR-TEM images including FFT and IFFT graphs of the pristine as-prepared material.

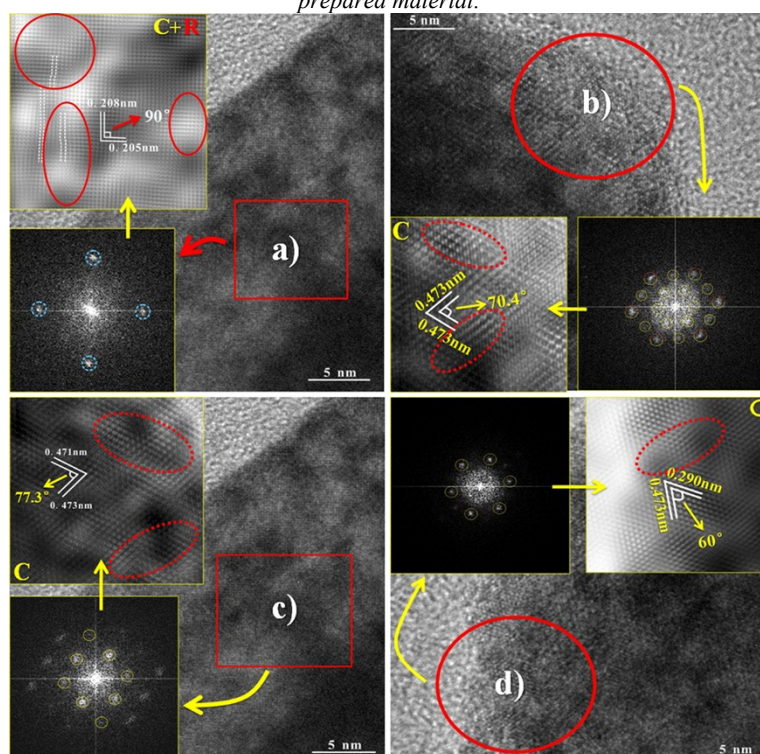

**5 Figure S3.** Four areas (a, b, c and d) in different particles from HR-TEM image including FFT and IFFT graphs at 4.20V of the first charge process.

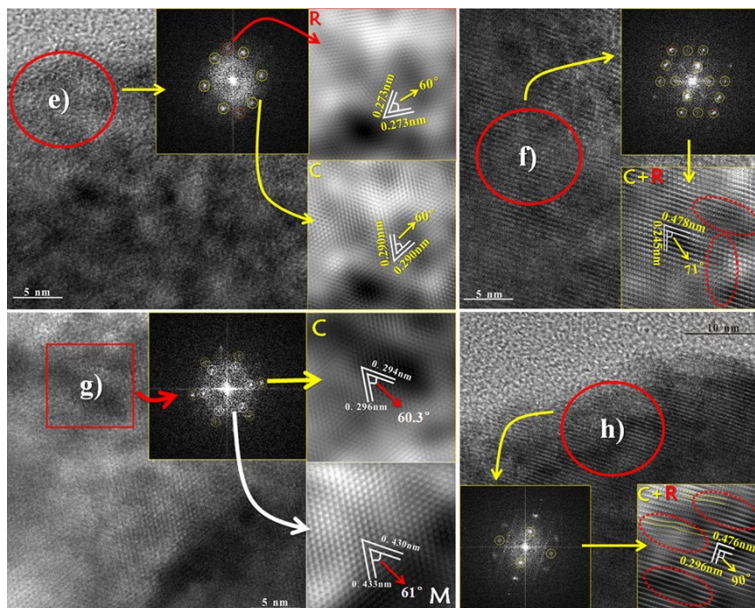

**Figure S4.** Four areas (e, f, g and h) in different particles from HR-TEM image including FFT and IFFT graphs at 4.20V of the first charge process.

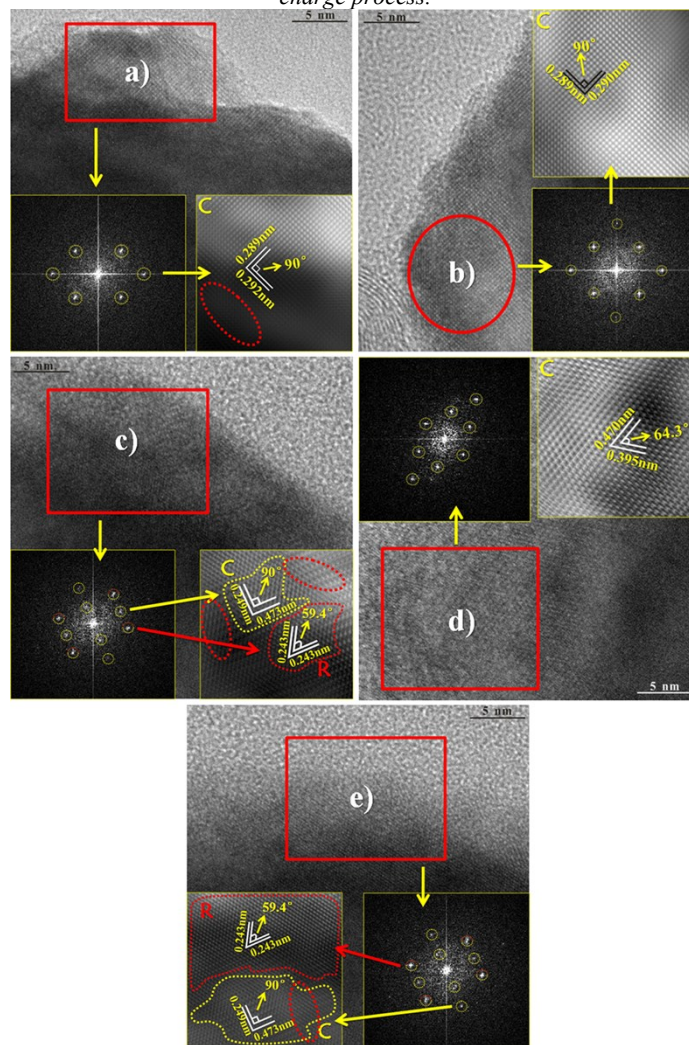

**5 Figure S5.** Five areas (a, b, c, d and e) in different particles from HR-TEM image including FFT and IFFT graphs at 4.50V of the first charge process.

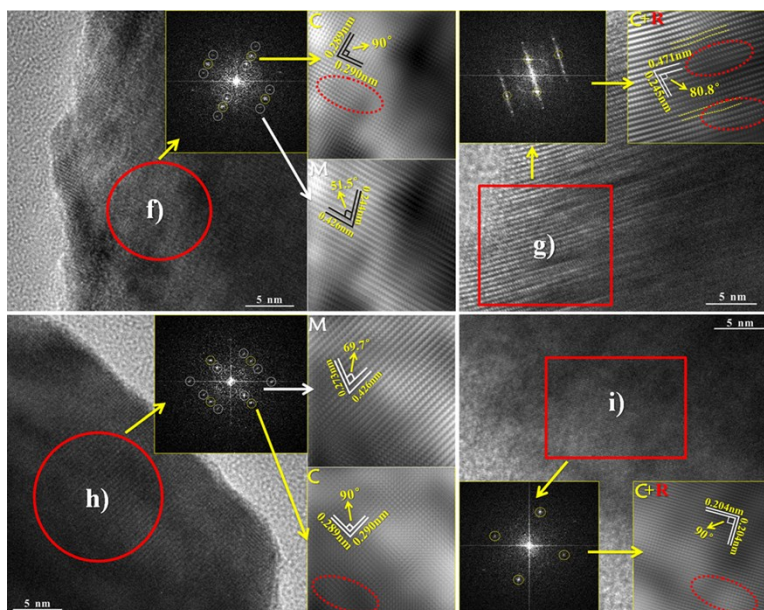

**Figure S6.** Four areas (f, g, h and i) in different particles from HR-TEM images including FFT and IFFT graphs at 4.50V of the first charge process.

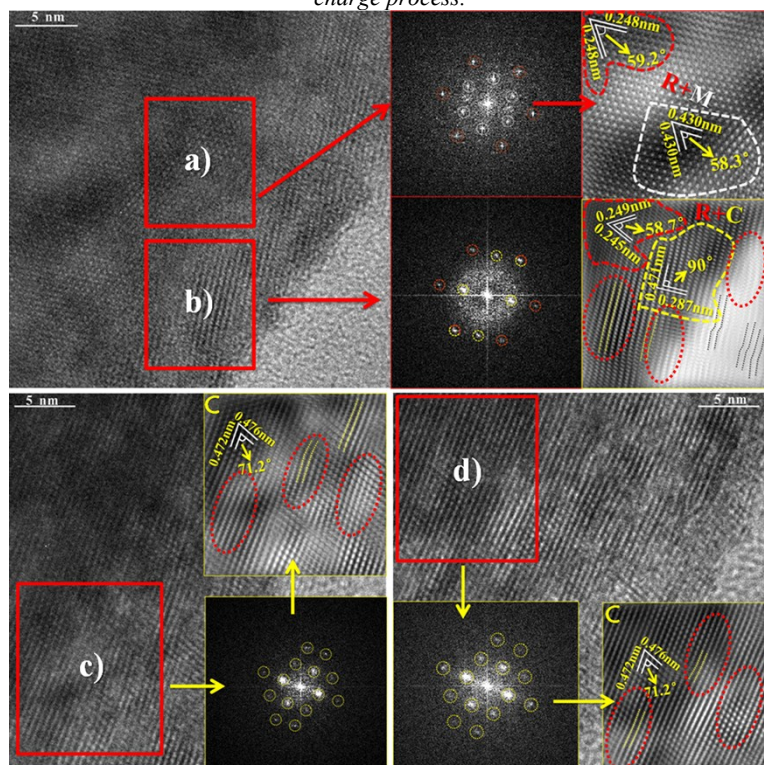

**5 Figure S7.** Four areas (a, b, c and d) in different particles from HR-TEM images including FFT and IFFT graphs at 4.70V of the first charge process.

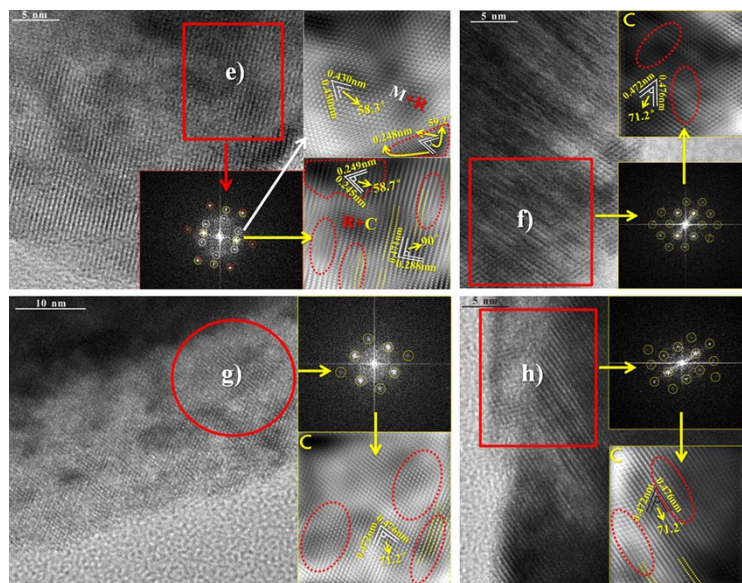

**Figure S8.** Four areas (e, f, g and h) in different particles from HR-TEM images including FFT and IFFT graphs at 4.70V of the first charge process.
